# Supplementary material for: CRISPR-Cas9 nuclear dynamics and target recognition in living cells
Source: PubMed Central journal article supplement — J Cell Biol. 2016 Aug 29;214(5):529–37. doi: 10.1083/jcb.201604115 (PMC5004447; doi:10.1083/jcb.201604115), 2016-08-29
Supplement: JCB_201604115_sm.pdf [file JCB_201604115_sm.pdf]

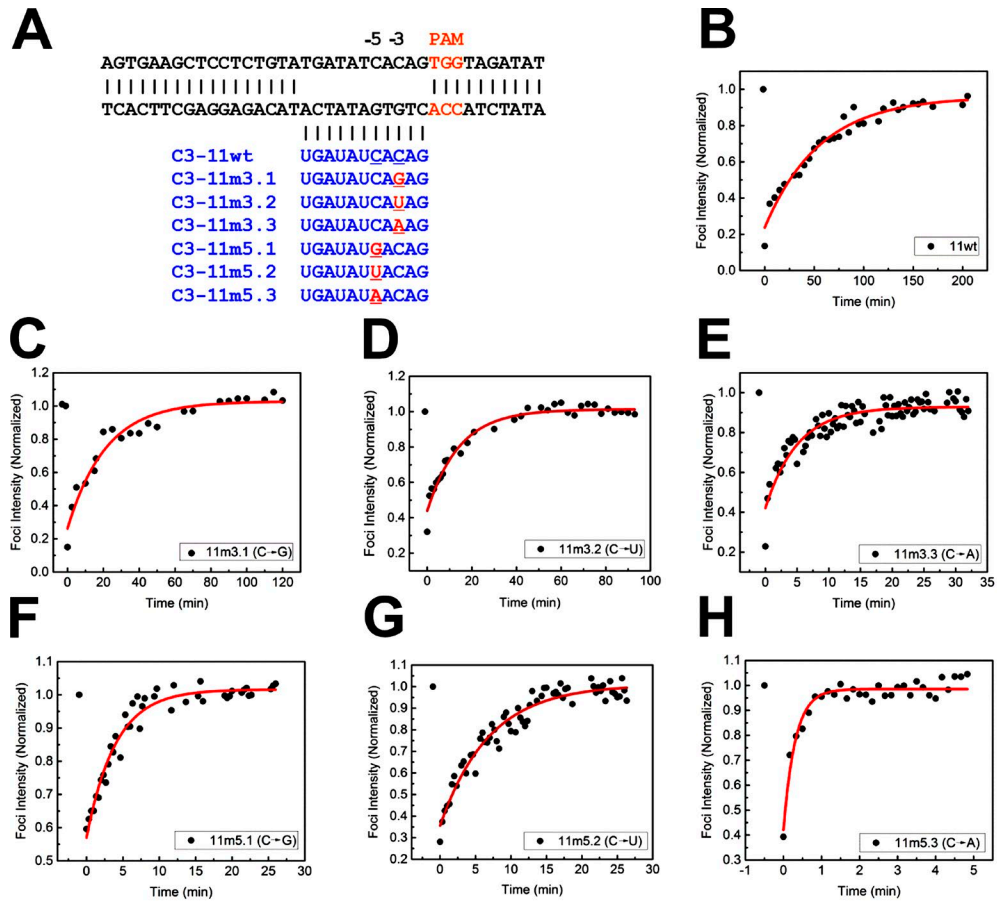

Figure S3. **Residence times of Cas9–guide RNA on targets.** (A) FRAP analysis was performed at target sites with C3-11 guide RNAs having single mismatches (red and underlined) at the -3 or -5 position of the seed region. The PAM sequence adjacent to the target is shown in orange. (B–H) Representative recovery rates observed with the guide RNAs are indicated in the insets of each panel; note the different time scales on the x axes. Data in all panels are representative of experiments performed at least three times.

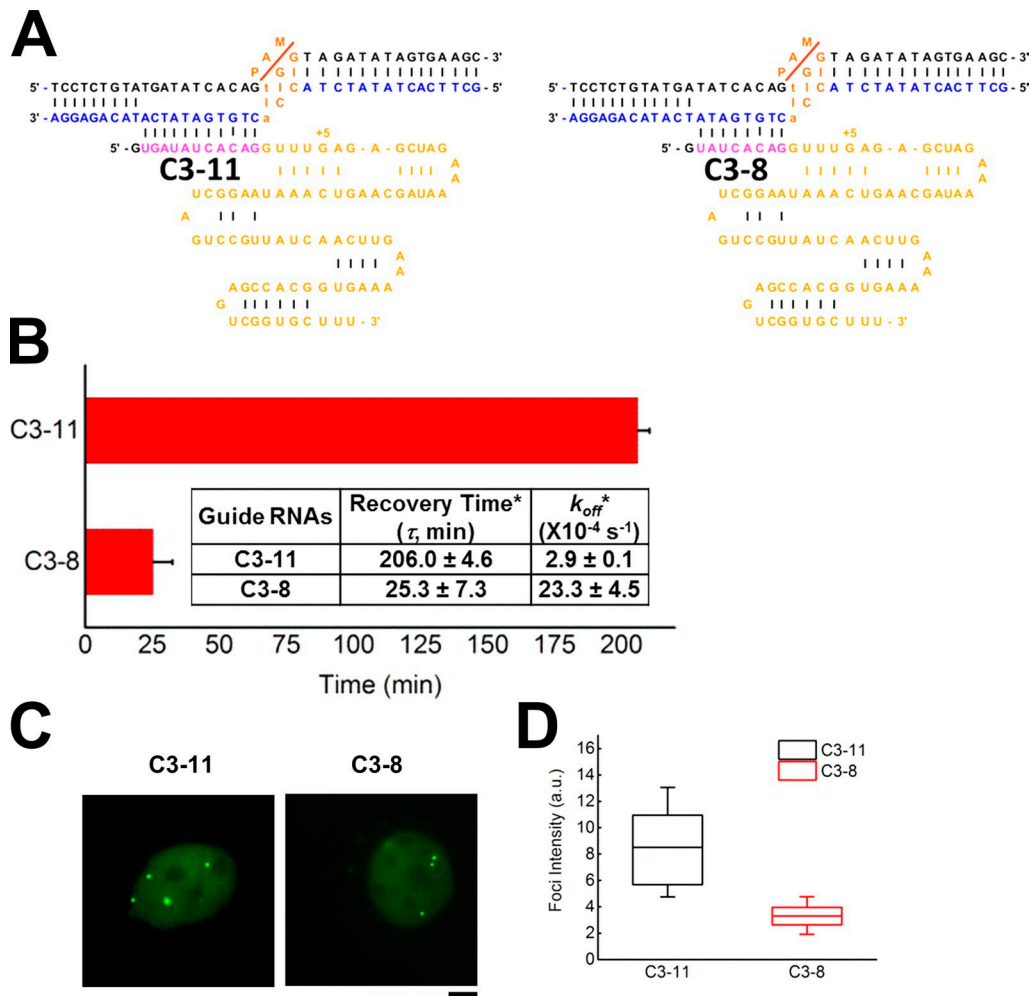

Figure S4. **Residence time for 8- versus 11-nt guide RNAs.** (A) The guide RNA was shortened to 8 nt (C3-8). Purple denotes guide sequences; yellow the guide RNA scaffold, blue the target sequence, and red the PAM. (B) Recovery time of dCas9-3XGFP/C3-8 guide RNA on target (C3). (inset table) The recovery times ( $\tau$ ) were measured by FRAP and dissociation rates ( $k_{off}$ ) were calculated as described in Materials and methods. (\*) The values represent the mean with standard errors from three independent experiments. (C) C3-11 or C3-8 guide RNAs were expressed in U2OS along with dCas9-3XGFP, and the foci brightness was examined under similar nuclear fluorescent backgrounds. Bar, 5  $\mu\text{m}$ . (D) Plots for the foci brightness ( $n = 26$  for C3-11 and  $n = 24$  for C3-8). Box spans from first to last quartiles. Whiskers represent 10/90 percentiles, and the middle lines represent the mean position.

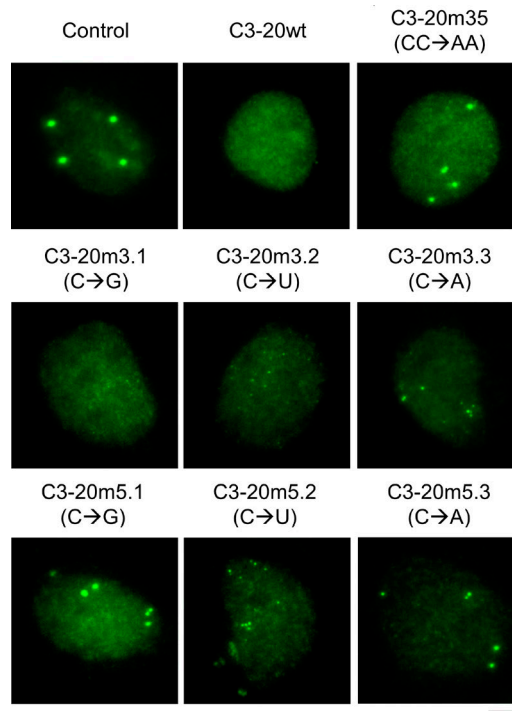

Figure S5. **Visualization of DNA cleavage in living cells.** U2OS cells were cotransfected with plasmids containing guide RNA pairs (C3-11 and C3-20 or mutants of C3-20) and Cas9-3XGFP and then fixed after 24 h and imaged by collecting z-stack images to capture all foci in each nucleus examined. Foci (control, noncleaved target), no foci (C3-20wt, highly cleaved target), or dispersed puncta (C3-20 mutants) are shown in representative images. Bar, 5  $\mu$ m. Data in all panels are representative of experiments performed at least three times.

Table S1. **Cas9 and guide RNAs used for CRISPR-Cas9 nuclear dynamics**

| Cas9             | Guide RNA1               | Guide RNA sequence (5'-3') | Guide RNA2      | Guide RNA sequence (5'-3') | Application      |
|------------------|--------------------------|----------------------------|-----------------|----------------------------|------------------|
| DD-dCas9-mCherry | C3-guide RNA-2XBroccoli  | UGAUUACACAG                | /               | /                          | Imaging and FACS |
| dCas9-mCherry    | C3-guide RNA-85-Broccoli | UGAUUACACAG                | /               | /                          | Imaging          |
| dCas9-mCherry    | C3-guide RNA-67-Broccoli | UGAUUACACAG                | /               | /                          | /                |
| dCas9-mCherry    | C3-guide RNA-54-Broccoli | UGAUUACACAG                | /               | /                          | /                |
| dCas9-3XGFP      | C3-11 (C3-11wt)          | UGAUUACACAG                | /               | /                          | Imaging and FRAP |
| dCas9-3XGFP      | C3-11m3.1                | UGAUUACAGAG                | /               | /                          | /                |
| dCas9-3XGFP      | C3-11m3.2                | UGAUUACAUAG                | /               | /                          | /                |
| dCas9-3XGFP      | C3-11m3.3                | UGAUUACAAAG                | /               | /                          | /                |
| dCas9-3XGFP      | C3-11m5.1                | UGAUUAGACAG                | /               | /                          | /                |
| dCas9-3XGFP      | C3-11m5.2                | UGAUUUACAG                 | /               | /                          | /                |
| dCas9-3XGFP      | C3-11m5.3                | UGAUUAAACAG                | /               | /                          | /                |
| Cas9-3XGFP       | C3-11                    | UGAUUACACAG                | C3-20 (C3-20wt) | UCCUCUGUAUGAUUACACAG       | Imaging          |
| Cas9-3XGFP       | C3-11                    | UGAUUACACAG                | C3-20m3.1       | UCCUCUGUAUGAUUACAGAG       | /                |
| Cas9-3XGFP       | C3-11                    | UGAUUACACAG                | C3-20m3.2       | UCCUCUGUAUGAUUACAUAG       | /                |
| Cas9-3XGFP       | C3-11                    | UGAUUACACAG                | C3-20m3.3       | UCCUCUGUAUGAUUACAAAG       | /                |
| Cas9-3XGFP       | C3-11                    | UGAUUACACAG                | C3-20m5.1       | UCCUCUGUAUGAUUAGACAG       | /                |
| Cas9-3XGFP       | C3-11                    | UGAUUACACAG                | C3-20m5.2       | UCCUCUGUAUGAUUUACAG        | /                |
| Cas9-3XGFP       | C3-11                    | UGAUUACACAG                | C3-20m5.3       | UCCUCUGUAUGAUUAAACAG       | /                |
| Cas9-3XGFP       | C3-11                    | UGAUUACACAG                | C3-20m35        | UCCUCUGUAUGAUUAAAAG        | /                |

The bold letters indicate the mutated nucleotide compared to the original guide RNA sequence. Slash (/) indicates not applicable.
